# Supplementary material for: Improved diabetic wound healing by LFcinB is associated with relevant changes in the skin immune response and microbiota
Source: PubMed Central journal article supplement — Mol Ther Methods Clin Dev. 2021 Feb 15;20:726–39. doi: 10.1016/j.omtm.2021.02.008 (PMC7940703; doi:10.1016/j.omtm.2021.02.008), 2021-02-15
Supplement: mmc1.pdf [file mmc1.pdf]

**OMTM, Volume 20**

**Supplemental information**

**Improved diabetic wound healing by LFcInB  
is associated with relevant changes  
in the skin immune response and microbiota**

**Michelle V. Mouritzen, Marija Petkovic, Katrine Qvist, Steen S. Poulsen, Susana Alarico, Ermelindo C. Leal, Louise T. Dalgaard, Nuno Empadinhas, Eugenia Carvalho, and Håvard Jensen**

Supplementary Table 1: List of primer sequences and annealing temperatures

| <b>Primers</b>                        | <b>Sequence (5'→3')</b> | <b>Annealing temperature</b> |
|---------------------------------------|-------------------------|------------------------------|
| <b>RPLP0 forward</b>                  | GCTTCCTGGAGGGTGTCC      | 52°C                         |
| <b>RPLP0 reverse</b>                  | GGACTCGTTTGTACCCGTTG    | 52°C                         |
| <b>IL-6 forward</b>                   | TACATCCTCGACGGCATCTC    | 60°C                         |
| <b>IL-6 reverse</b>                   | ACCAGGCAAGTCTCCTCATTG   | 60°C                         |
| <b>IL-8 forward</b>                   | CACCGGAAGGAACCATCTCA    | 60°C                         |
| <b>IL-8 reverse</b>                   | TTGGGGTGGAAAGGTTTGGAG   | 60°C                         |
| <b>TNF<math>\alpha</math> forward</b> | TTCCTGATCGTGGCAGGC      | 60°C                         |
| <b>TNF<math>\alpha</math> reverse</b> | GAGCTGCCCTCAGCTTG       | 60°C                         |

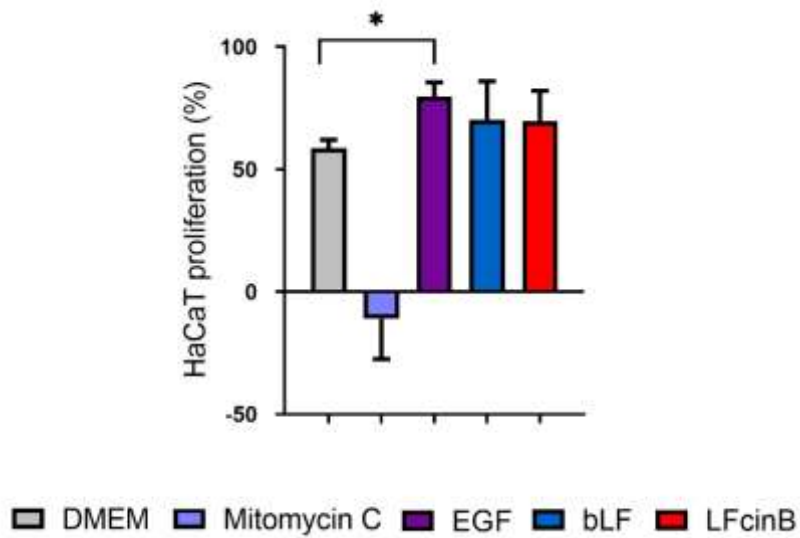

Supplementary Figure 1. Lactoferricin (LFcinB) and bovine lactoferrin (bLF) effect on HaCaT cell proliferation *in vitro*. The proliferation potential of LFcinB and bLF at 25  $\mu\text{g/ml}$  were evaluated on the oCelloScope which was set to record the proliferation for 48 hours. Images acquired every 12th hour were used to quantify the proliferation rate. Epidermal growth factor (EGF), mitomycin C and DMEM were used as the positive and negative controls. \* =  $p < 0.05$ .

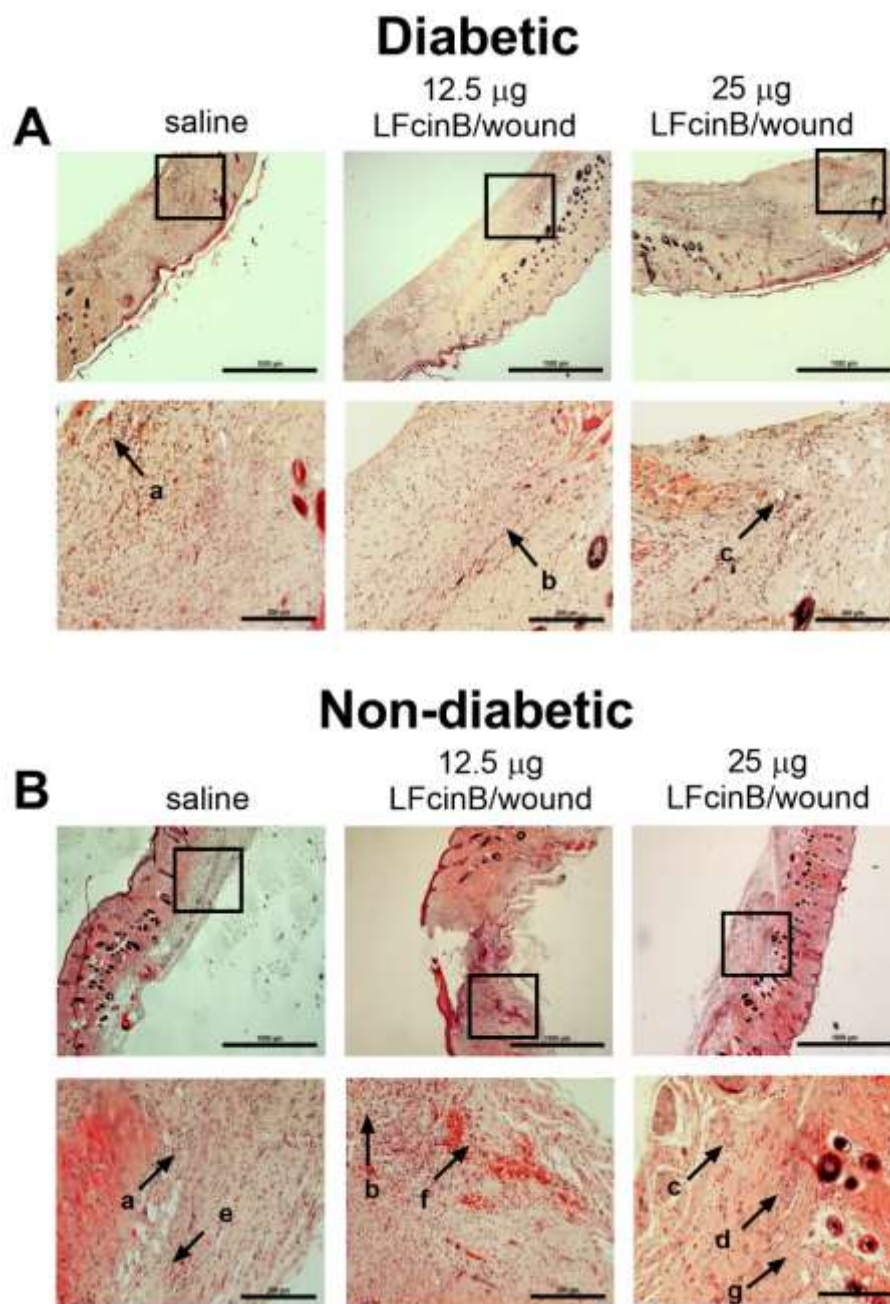

Supplementary Figure 2. Inflammatory response and tissue regeneration after dermal treatments with LFcinB. **A)** Representative photomicrographs of skin wound biopsies from diabetic animals following the treatment with saline and LFcinB, stained with standard hematoxylin and eosin.

**B)** Representative photomicrographs of skin wound biopsies from non-diabetic animals following the treatment with saline and LFcinB, stained with standard hematoxylin and eosin. **a)** Influx of

immune cells (fibroblasts and macrophages) **b)** Granulation tissue **c)** Blood vessels **d)** Inflammatory infiltrate **e)** Infiltrate enriched in neutrophils due to acute inflammation **f)** Hemorrhagic spots in the dermal area **g)** Visible granulation tissue and less inflammation.

Magnifications=50× and 200× for boxed areas. Scale bars=1000 μm and 200 μm for boxed areas.

Black arrows indicate the morphological changes (n=4 animals per group).

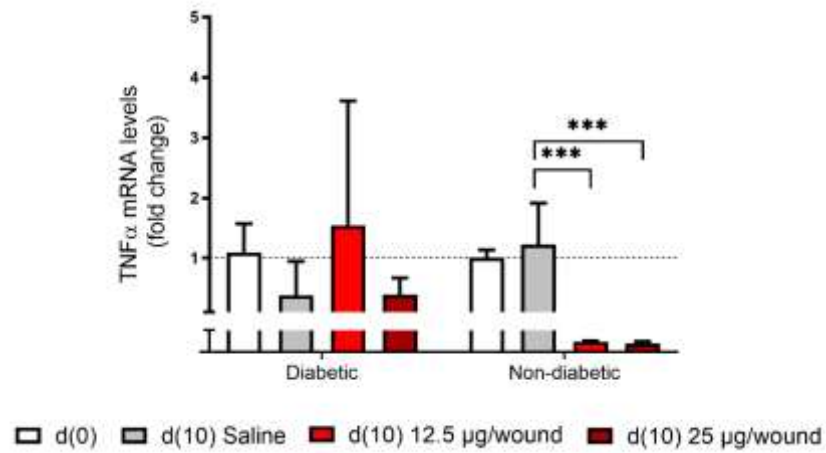

Supplementary Figure 3. LFCinB alters mRNA cytokine levels in diabetic and healthy mouse skin wounds. The pro-inflammatory cytokine tumor necrosis  $\alpha$  (TNF $\alpha$ ) mRNA levels were measured by qPCR in skin wounds collected from diabetic and healthy mice. Skin wounds from three treatments groups: Low and high dose bovine lactoferricin (12.5 and 25  $\mu$ g/wound) or saline were harvested before the wounding d (0) and 10 days post-wounding d (10). \*\*\* =  $p < 0.001$ .
